# Supplementary material for: Role of Tobacco Use in the Etiology of Acoustic Neuroma
Source: PubMed Central journal article supplement — Am J Epidemiol. 2012 Apr 19;175(12):1243–51. doi: 10.1093/aje/kwr465 (PMC3372315; doi:10.1093/aje/kwr465), 2012-04-19
Supplement: supp_kwr465_kwr465_Web_Table.pdf [file supp_kwr465_kwr465_Web_Table.pdf]

**WEB TABLE 1 - RISK OF ACOUSTIC NEUROMA IN RELATION TO SMOKING STATUS<sup>1</sup> AND PACK-YEARS**

| Factor              | Men         |              |                          | Women       |              |                          | All         |              |                          |
|---------------------|-------------|--------------|--------------------------|-------------|--------------|--------------------------|-------------|--------------|--------------------------|
|                     | Cases (%)   | Controls (%) | OR (95% CI) <sup>2</sup> | Cases (%)   | Controls (%) | OR (95% CI) <sup>2</sup> | Cases (%)   | Controls (%) | OR (95% CI) <sup>2</sup> |
| Ever regular smoker |             |              |                          |             |              |                          |             |              |                          |
| No                  | 127 (54.98) | 168 (46.93)  | 1.0 <sup>4</sup>         | 106 (55.50) | 148 (52.48)  | 1.0 <sup>4</sup>         | 233 (55.21) | 316 (49.38)  | 1.0 <sup>4</sup>         |
| Yes                 | 104 (45.02) | 190 (53.07)  | 0.73 (0.51-1.05)         | 85 (44.50)  | 134 (47.52)  | 0.88 (0.59-1.29)         | 189 (44.79) | 324 (50.63)  | 0.80 (0.61-1.04)         |
| Smoking Pack-Years  |             |              |                          |             |              |                          |             |              |                          |
| <20                 | 78 (33.77)  | 119 (33.24)  | 0.87 (0.59-1.29)         | 60 (31.41)  | 99 (35.11)   | 0.84 (0.56-1.27)         | 138 (32.70) | 218 (34.06)  | 0.87 (0.65-1.15)         |
| ≥20                 | 25 (10.82)  | 64 (17.88)   | 0.46 (0.26-0.81)         | 20 (10.47)  | 31 (10.99)   | 0.90 (0.48-1.69)         | 45 (10.66)  | 95 (14.84)   | 0.62 (0.39-0.94)         |
| Smoking Status      |             |              |                          |             |              |                          |             |              |                          |
| Ex-smoker           | 85 (36.80)  | 125 (34.92)  | 0.97 (0.64-1.46)         | 59 (30.89)  | 81 (28.72)   | 0.98 (0.63-1.50)         | 144 (34.12) | 206 (32.19)  | 0.98 (0.73-1.32)         |
| Smoking Pack-Years  |             |              |                          |             |              |                          |             |              |                          |
| <20                 | 70 (30.30)  | 89 (24.86)   | 1.01 (0.65-1.58)         | 47 (24.61)  | 66 (23.40)   | 0.89 (0.54-1.45)         | 117 (27.73) | 155 (24.22)  | 0.96 (0.69-1.34)         |
| ≥20                 | 14 (6.06)   | 31 (8.67)    | 0.47 (0.21-1.07)         | 8 (4.19)    | 11 (3.90)    | 1.39 (0.47-4.18)         | 22 (5.21)   | 42 (6.56)    | 0.67 (0.35-1.27)         |
| Current smoker      | 19 (8.23)   | 63 (17.60)   | 0.41 (0.23-0.74)         | 26 (13.61)  | 52 (18.44)   | 0.70 (0.40-1.23)         | 45 (10.66)  | 115 (17.97)  | 0.54 (0.36-0.81)         |
| Smoking Pack-Years  |             |              |                          |             |              |                          |             |              |                          |
| <20                 | 8 (3.46)    | 28 (7.82)    | 0.38 (0.14-1.02)         | 13 (6.81)   | 32 (11.35)   | 0.60 (0.25-1.44)         | 21 (4.98)   | 60 (9.38)    | 0.51 (0.27-0.96)         |
| ≥20                 | 11 (4.76)   | 33 (9.22)    | 0.48 (0.19-1.19)         | 12 (6.28)   | 20 (7.09)    | 1.40 (0.55-3.61)         | 23 (5.45)   | 53 (8.28)    | 0.84 (0.45-1.58)         |

<sup>1</sup>Smoking is defined as at least one cigarette daily for six months or longer. <sup>2</sup>Odds ratios [ORs] from conditional logistic regression models stratified by matched set. Cases and controls were matched on gender, age (within 5 years at the reference date), and region. ORs were adjusted for highest level of education and snuff use (never versus ever). <sup>3</sup>ORs for women were similarly constructed, but were not adjusted for snuff use due to lack of snuff users in the population. <sup>4</sup>Reference category for entire table. Note: Number of observations throughout the table vary by smoking category due to missing values. Each factor in the table represents a different regression coefficient with different covariates.
